# Supplementary material for: Uremia does not affect neointima formation in mice
Source: PubMed Central journal article supplement (PMC5529519; doi:10.1038/s41598-017-06816-6), 2017-07-26
Supplement: 41598_2017_6816_MOESM1_ESM.pdf [file 41598_2017_6816_MOESM1_ESM.pdf]

# Supplementary information

## Uremia does not affect neointima formation in mice

Annemarie Aarup<sup>1</sup>, Carsten H. Nielsen<sup>2</sup>, Line S. Bisgaard<sup>1</sup>, Ilze Bot<sup>3</sup>, Henrik H. El-Ali<sup>2</sup>, Andreas Kjaer<sup>2</sup>, Lars B. Nielsen<sup>1,4</sup>, and Tanja X. Pedersen<sup>1</sup>

<sup>1</sup> Department of Biomedical Sciences, University of Copenhagen, Copenhagen, Denmark

<sup>2</sup> Department of Clinical Physiology, Nuclear Medicine & PET and Cluster for Molecular Imaging, Rigshospitalet, University of Copenhagen, Copenhagen, Denmark

<sup>3</sup> Division of Biopharmaceutics, Leiden Academic Centre for Drug Research, Leiden University, Leiden, The Netherlands

<sup>4</sup> Copenhagen University Hospital, Rigshospitalet, Department of Clinical Biochemistry (Copenhagen, Denmark)

Corresponding author: Tanja X. Pedersen ([tanjax@sund.ku.dk](mailto:tanjax@sund.ku.dk))

## Suppl. Figure 1

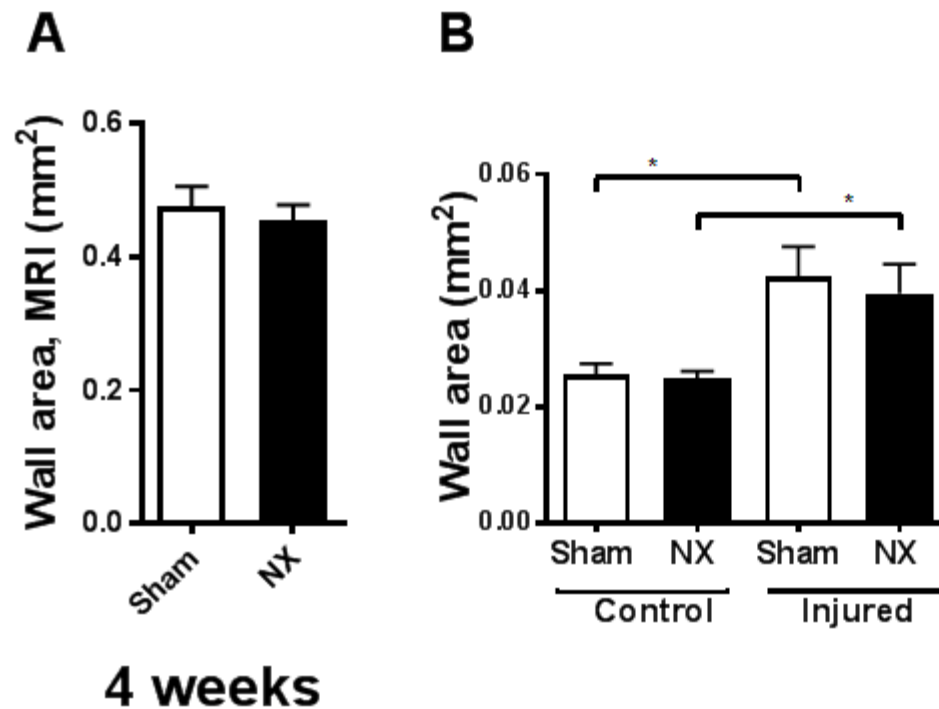

### Suppl. Figure 1. Uremia does not affect carotid wall area following wire-induced injury.

**A.** Quantification of cross-sectional vascular wall area by in vivo serial magnetic resonance imaging (MRI) in injured carotids of uremic (NX) and sham-operated (sham) C57Bl/6 mice 4 weeks after wire injury (average of 4 serial pictures per mouse, n=5/group). **B.** Quantification of cross-sectional vascular wall area of injured and control carotid arteries from NX (n=11) and sham (n=8) mice. Average of 8-12 sections per mouse. Data are presented as mean±SEM. \*p<0.05. Unpaired t-test (**A**) or 1-way ANOVA followed by Sidak's multiple comparison test (**B**).

## Suppl. Figure 2

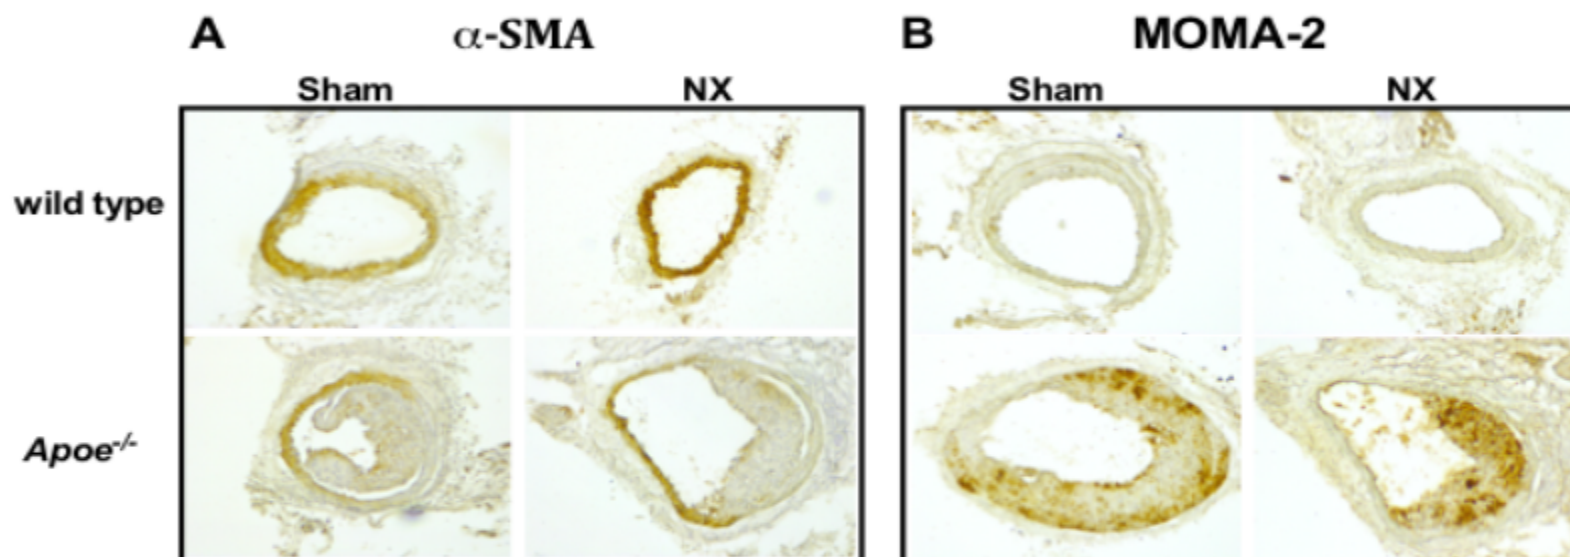

**Suppl. Fig 2. Uremia does not affect smooth muscle and macrophage staining in carotid arteries after vascular injury in wild type and *Apoe*<sup>-/-</sup> mice.**

Immunohistochemical analysis of carotid arteries from sham-operated (sham) and uremic (NX) wild type and *Apoe*<sup>-/-</sup> mice following wire-induced vascular injury. **A.** Sections stained for the smooth muscle marker  $\alpha$ -SMA. **B.** sections stained for the macrophage marker MOMA-2. Brown staining indicates positive cells in both **A** and **B**.

## Suppl. Figure 3

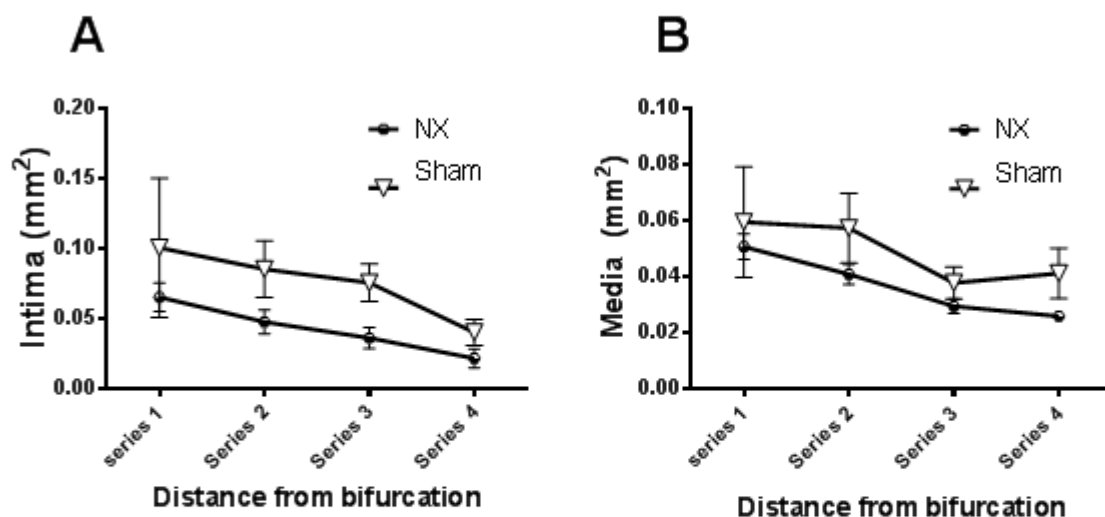

### Suppl. Figure 3. Uremia does not affect the intimal or medial area after vascular injury in carotids of *Apoe*<sup>-/-</sup> mice.

Histological quantification of cross-sectional intimal (**A**) and medial (**B**) areas in injured carotid arteries from uremic (NX, n=11) and sham-operated (sham, n=7) *Apoe*<sup>-/-</sup> mice, 4 weeks after wire injury. Sections are from 4 different anatomical locations, series 1-4, average of 2-4 sections/mouse per series. Unpaired t-test with Holm-Sidak correction for multiple comparisons.

## Suppl. Figure 4

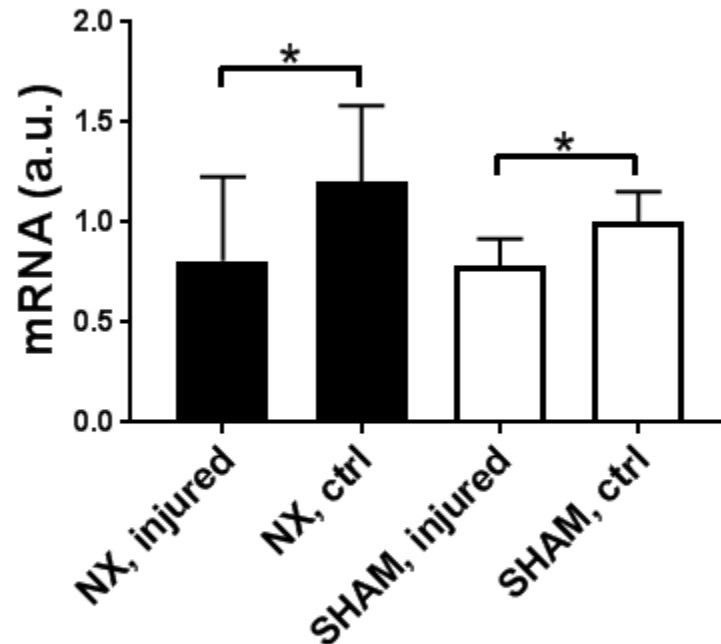

**Suppl. Figure 4. Wire injury leads to downregulation of mRNA expression of PECAM1.**

mRNA expression of PECAM1 in injured or un-injured control (ctrl) carotids from sham-operated (sham) or uremic (NX) mice. PECAM1 expression was normalized to expression of the housekeeping gene CANX and is reported in arbitrary units (a.u.). Depicted values are mean  $\pm$  SD. \* $p < 0.05$ . Unpaired t-test.
